# Supplementary material for: Human ERAL1 is a mitochondrial RNA chaperone involved in the assembly of the 28S small mitochondrial ribosomal subunit
Source: PubMed Central journal article supplement — Biochem J. 2010 Aug 27;430(Pt 3):551–8. doi: 10.1042/BJ20100757 (PMC2995420; doi:10.1042/bj20100757), 2010-08-27
Supplement: bj4300551add.pdf [file bj4300551add.pdf]

SUPPLEMENTARY ONLINE DATA

**Human ERAL1 is a mitochondrial RNA chaperone involved in the assembly of the 28S small mitochondrial ribosomal subunit**

Sven DENNERLEIN, Agata ROZANSKA, Mateusz WYDRO<sup>1</sup>, Zofia M. A. CHRZANOWSKA-LIGHTOWLERS<sup>2</sup> and Robert N. LIGHTOWLERS<sup>2</sup>

Mitochondrial Research Group, Institute for Ageing and Health, Newcastle University, Newcastle upon Tyne NE2 4HH, U.K.

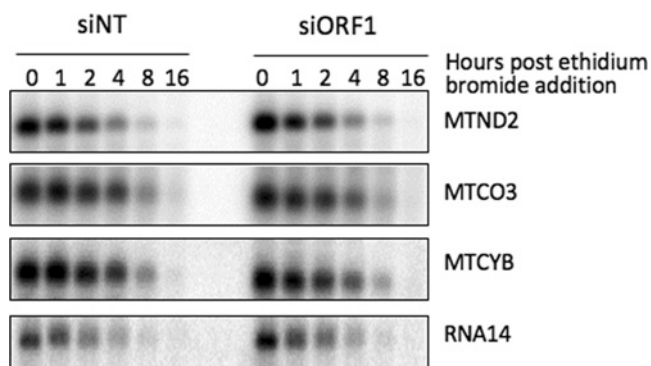

**Figure S1** Stability of mitochondrially encoded transcripts is unaffected by loss of ERAL1

HEK-293T cells were transfected with control (siNT) or ERAL1-targeting (siORF1) siRNA for 3 days, after which mitochondrial transcription was inhibited by the addition of ethidium bromide (250 ng/ml). RNA was then isolated at the time points indicated post-addition of transcriptional inhibitor and 4 μg of each sample was separated through 1.2% agarose under denaturing conditions. Northern blot analysis was performed with random hexamer generated DNA probes to the mitochondrial transcripts indicated. MTCO3, COX3; MTCYB; mitochondrially encoded cytochrome *b*.

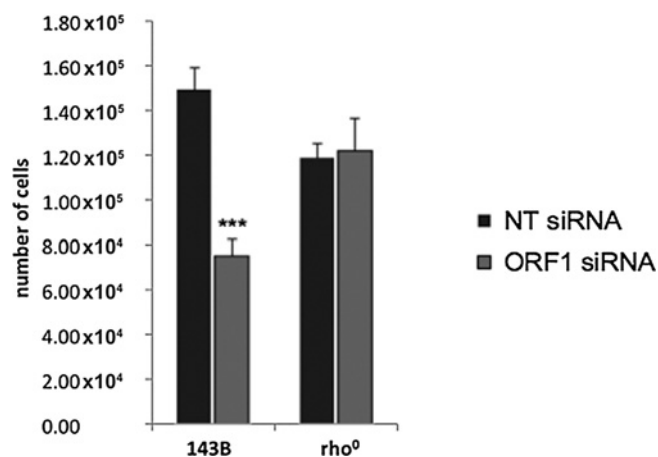

**Figure S2** Confirmation that siORF1 that targets ERAL1 lacks off-target effects

End-point cell proliferation was quantified after 3 days of siRNA depletion of ERAL1 in 143B parental and rho<sup>0</sup> cells with control (NT siRNA) or ERAL1-targeting (ORF1 siRNA). Depletion of ERAL1 with siORF1 showed a significant effect on the proliferation of parental 143B osteosarcoma cells (rho<sup>+</sup>), that contain mtDNA. In contrast, no effect on cell growth was observed in 143B rho<sup>0</sup> cells (supplemented with 50 μg/ml uridine) that lack mtDNA and therefore are unaffected as they do not require mtDNA gene expression for growth. Results are means ± S.D. *P* < 0.001.

<sup>1</sup> Present address: Department of Plant Sciences, University of Cambridge, Downing Site, Downing Street, Cambridge CB2 3EA, U.K.

<sup>2</sup> Correspondence may be addressed to either of these authors (email z.chrzanowska-lightowlers@ncl.ac.uk or r.n.lightowlers@ncl.ac.uk).

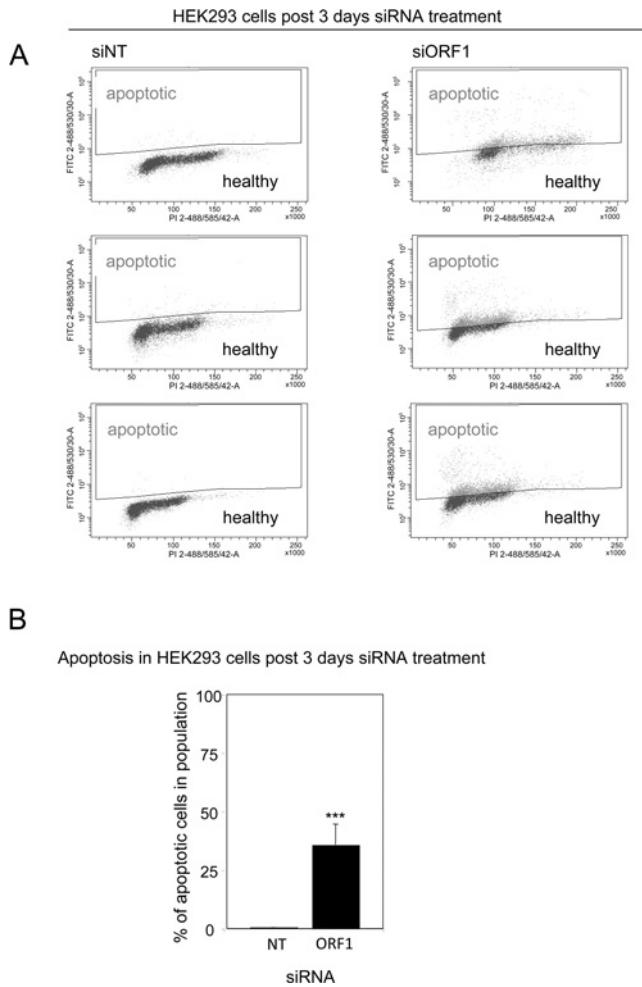

**Figure S3 Analysis of apoptosis in HEK-293T cells post-siRNA treatment**

HEK-293T cells were treated with control (siNT) or ERAL1-targeting (siORF1) siRNA for 3 days after which the proportion of apoptotic cells was estimated using the APO-Direct kit. **(A)** Representative primary FACS data for the both control and ERAL1-depleted cells. Analyses were performed on independent cultures of siRNA-transfected HEK-293T cells. **(B)** Quantification of the results in **(A)** is presented ( $n = 4$ ) as a percentage of apoptotic cells within the population. Results are means + S.D.  $P < 0.001$ .

**Table S1 Sequences of all 31 short RNA species bound by ERAL1 in the CLIP assay**

N, signifies not determined by sequencer; \*12S mt-rRNA sequences are portrayed in a linear fashion in Figure 3 in the main paper. TNF, tumour necrosis factor.

| CLONE NO. | SEQUENCE                                                           | IDENTITY                          |
|-----------|--------------------------------------------------------------------|-----------------------------------|
|           | .....TCGTAACATGGTAAGTGTACTGGAAAGTGCACCTGGACGAAC 3'term<br>(nt1601) | <b>MT-RNR2</b><br>(12S mt-rRNA) * |
| 1.13      | .....CGTAACATGGTAAGTGTACTGGAAAGTGCACCTGGACGAAC                     |                                   |
| 1.14      | .....CGTAACATGGTAAGTGTACTGGA..GTGCACCTGGACGAA                      |                                   |
| 1.15      | .....CGTAACATGGTAAGTGTACTGGAAAGTGCACCTGGACGAACA                    |                                   |
| 1.18      | .....CGTAACATGGTAAGTGTACTGGAAAGTGCACCTGGACGAACA                    |                                   |
| 1.21      | .....CGTAACATGGTAAGTGTACTGGAAAGTGCACCTGGACGAACA                    |                                   |
| 1.22      | .....AGTCGTAACATGGTAAGTGTACTGGAAAGTGCACCTGGACG                     |                                   |
| 1.23      | .....CGTAACATGGTAAGTGTACTGGAAAGTGCACCTGGACGAAC                     |                                   |
| 1.24      | .....CGTAACATGGTAAGTGTACTGGAAAGTGCACCTGGACGA                       |                                   |
| 1.25      | .....AGTCGTAACATGGTAAGTGTACTGGAAAGTGCACCTGGACGAAC                  |                                   |
| 2.10      | .....AGTCGTAACAT*GTAAGTGTACTGGAAAGTGCACNTGGACGAACAAAG              |                                   |
| 2.11      | .....GTAACATGGTAAGTGTACTGGAAAGTGCACCTGGACGAAC                      |                                   |
| 2.13      | .....CGTAACATGGTAAGTGTACTGGAAAGTGCACCTGGACGAAC                     |                                   |
| 2.14      | .....AGTCGTAACATGGTAAGTGTACTGGAAAGTGCACCTGGACGAAC                  |                                   |
| 2.3       | .....AGTCGTAACATGGTAAGTGTACTGGAAAGTGCACCTGGACGAAC                  |                                   |
| 2.6       | .....*GGCCGTAACATGGTAAGTGTACTGGAAAGTGCACCTGGACGAACA                |                                   |
| 2.7       | .....AGTCGTAACATGGTAAGTGTACTGGAAAGTGCACCTGGACGAAC                  |                                   |
| 2.8       | .....CGTAACATGGTAAGTGTACTGGA..GTGCACCTGGACGAA                      |                                   |
| 2.20      | .....CATGGTAAGTGTACTGGAAAGTGCACCTGGACGAAC                          |                                   |
| 2.22      | .....CGTAACATGGTAAGTGTACTGGAAAGTGCACCTGGACGAACA                    |                                   |
| 2.24      | .....CGTAACATGGTAAGTGTACTGGAAAGTGCACCTGGACGAAC                     |                                   |
| 2.25      | .....GTCGTAACATGGTAAGTGTACTGGAAAGTGCACCTGGACGAAAA                  |                                   |
| 2.26      | .....CGTAACATGGTAAGTGTACTGGAAAGTGCACCTGGACGAAC                     |                                   |
| 2.28      | .....CAAGTCGTAACATGGTAAGTGTACTGGAAAGTGCACCTGGACGAAC                |                                   |
| 2.29      | GAGACAAGTCGTAACATGGTAAGTGTACTGGAAAGTGCACCTGGACGAAC                 |                                   |
| 2.31      | .....CGTAACATGGTAAGTGTACTGGAAAGTGCACCTGGNNGANCA                    |                                   |
| 2.32      | .....CGTAACATGGTAAGTGTACTGGAAAGTGCNCTGGACGA                        |                                   |
| 2.34      | .....GTCGTAACATGGTAAGTGTACTGGAAAGTGCACCTGGACGAAC                   |                                   |
| 2.36      | .....CGTAACATGGTAAGTGTACTGGAAAGTGCACCTGGACGAACA                    |                                   |
| 2.37      | .....AGTCGTAACATGGTAAGTGTACTGGAAAGTGCACCTGGACGAACA                 |                                   |
| 2.38      | .....CGNAACATGGTAAGTGTACTGGAAAGNACACNTGGACGAAC                     |                                   |
| 2.40      | .....CATGGTAAGTGTACTGGAAAGTGCACCTGGACGAAC                          |                                   |
|           | GGCGCTAATGGTGGAGTTAAAGACTTTTTCTCTGACCA                             | <b>MT-TP</b><br>(Mt-IRNAPro)      |
| 1.16F     | .GGCGCTAATGGTGGAGTTAAAGACTTTTTCTCTGACCA                            |                                   |
| 1.17R     | GGTGCTAATGGTGGAGTTAAAGACTTTTTCTCTGA                                |                                   |
| 1.26      | .GGTGCTAATGGTGGAGTTAAAGACTTTTTCTCT                                 |                                   |
| 2.16      | ..GTGCTAATGGTGGAGTTAAAGACTTTTTCTCT                                 |                                   |
| 2.9       | .GGTGCTAATGGTGGAGTTAAAGACTTTTTCTCTGAC                              |                                   |
| 2.21      | .GGTGCTAATGGTGGAGTTAAAGACTTTTTCTCT                                 |                                   |
| 2.27      | GGTGCTAATGGTGGAGTTAAAGACTTTTTCTCTGACCA                             |                                   |
|           |                                                                    | <b>E. coli 23S rRNA</b>           |
| 1.19      | GGGGTCCATCCCAGCTTACCAACCAGTGCACCACTCCGAATACCAGCAA                  |                                   |
| 2.18      | ATTATACAAAAGTACGCAGTCACCGAACAAGTCGGCTCCAC                          |                                   |
|           |                                                                    | <b>KNOWN H. sapiens</b>           |
| 2.2       | CGCACGGGTACAACCACGACCAATGATATG                                     | HSP70 protein 8 iso 1             |
| 2.6       | TCTAGATGCATCTTTAGGAAGGCTCTGTGGAAGGACAAAGGACCTGGGACCGGACTGG         | TNF receptor family 10B           |
| 2.41      | AGCGTGTGCCATACCTACGCCGCGAGCGGGTAACCCGTTGAAC                        | 18S rRNA                          |
|           |                                                                    | <b>UNKNOWN</b>                    |
| 2.12      | AGGAAGTCGATGTTTCAGGCTGTGCTCATGGGCTTCGTCGACAATGATG                  |                                   |
| 2.15      | ACACACTGATTCAGGCTCTGGGCTCCTCCCC                                    |                                   |
| 2.17      | GTGATAGCCGCTACACTACGACC                                            |                                   |
| 2.23      | GGTAGTCTCGGCCCTAAACGATGATCACTAG                                    |                                   |
| 2.35      | ATCACTTTCGCATACGGGCTGTACCCGCTATGGCCACACTTTCAGAGTGTCTGC             |                                   |
| 2.40      | TCGTCAGAGAAACAGCAAGCTGTTTCCGTGTACCG                                |                                   |

Received 21 May 2010/30 June 2010; accepted 6 July 2010  
 Published as BJ Immediate Publication 6 July 2010, doi:10.1042/BJ20100757
